# Supplementary material
Source: PubMed Central journal article supplement (PMC3062327)
Supplement: blood-2010-06-288027_1.pdf [file blood-2010-06-288027_1.pdf]

**Table S1. Primers and probes used in the single cell q-PCR analysis**

| <b>Primers</b>   |                           |                   |             |                |
|------------------|---------------------------|-------------------|-------------|----------------|
| <b>Gene Name</b> | <b>Primer Sequence</b>    | <b>Conc. (nM)</b> | <b>Dyes</b> | <b>Company</b> |
| Bcl-6F           | CAGACGCACAGTGACAAACCA     | 60                | -           | -              |
| Bcl-6R           | ACTGCGCTCCACAAATGTTACA    | 300               | -           | -              |
| Blimp-1F         | CAAGAATGCCAACAGGAAGTATTTT | 80                | -           | -              |
| Blimp-1R         | CCATCAATGAAGTGGTGGAACTC   | 100               | -           | -              |
| b-actinF         | CGTGAAAAGATGACCCAGATCA    | 70                | -           | -              |
| b-actinR         | TGGTACGACCAGAGGCATACAG    | 50                | -           | -              |

| <b>Probes</b> |                            |                   |                                      |                                     |
|---------------|----------------------------|-------------------|--------------------------------------|-------------------------------------|
| <b>Name</b>   | <b>Probe Sequence</b>      | <b>Conc. (nM)</b> | <b>Dyes</b>                          | <b>Company</b>                      |
| Bcl-6         | CAGCCACAAGACTGTCCACACGGGT  | -                 | FAM, Black Hole Quencher 1           | Eurogentec, Seraing, Belgium        |
| Blimp-1       | TCTCTGGAATAGATCCGCCA       | -                 | NED                                  | Applied Biosystems, Foster City, CA |
| b-actin       | TCAACACCCCAGCCATGTACGTAGCC | -                 | Yakima Yellow, Black Hole Quencher 1 | Eurogentec, Seraing, Belgium        |

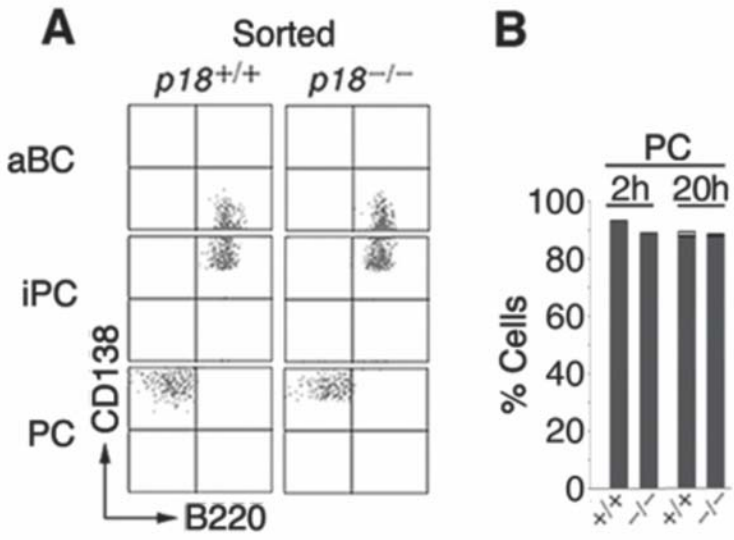

**Figure S1. PCs are stable in culture**

(A) Re-analysis of sorted populations by FACS. (B) The percentage of R1, R2 and R3 from Figure 1C, PCs at 2 hours after sorting and 20 hours in culture, in B media.

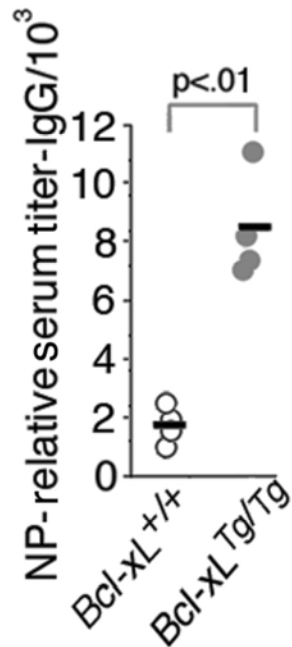

**Figure S2. *Bcl-xL* transgenic mice secrete a greater amount of antigen specific IgG**

ELISA for NP-specific IgG in individual *Bcl-xL*<sup>+/+</sup> and *Bcl-xL*<sup>Tg/Tg</sup> mice (+/, n=6; Tg/Tg, n=4).
